# Supplementary material for: Performance Testing of Bacillus cereus Chromogenic Agar Media for Improved Detection in Milk and Other Food Samples
Source: MDPI journal article supplement (doi:10.3390/foods11030288), 2022-01-21
Supplement: s1 [file s1]

**Supplementary Table S1.** Media specifications according to the respective manufacturer's descriptions.

| Agar                                       |            | Mannitol egg yolk polymyxin (MYP) agar                                       | ChromoSelect <i>Bacillus</i> agar               | Brilliance™ <i>B. cereus</i> agar                                 | CHROMagar™ <i>B. cereus</i>                              | BACARA® agar                                                                    |
|--------------------------------------------|------------|------------------------------------------------------------------------------|-------------------------------------------------|-------------------------------------------------------------------|----------------------------------------------------------|---------------------------------------------------------------------------------|
| Manufacturer                               |            | Thermo Fisher Scientific Inc., Oxoid, Waltham, USA                           | Merck KgaA, Darmstadt, Germany                  | Thermo Fisher Scientific Inc., Oxoid, Waltham, USA                | CHROMagar, Paris, France                                 | bioMérieux, Marcy-l'Étoile, France                                              |
| Composition                                |            |                                                                              |                                                 |                                                                   |                                                          |                                                                                 |
| Agar                                       | g/L        | 12.0                                                                         | 15.0                                            | 13.0                                                              | 15.0                                                     | 18.0                                                                            |
| Meat extract                               | g/L        | 1.0                                                                          | 1.0                                             |                                                                   |                                                          |                                                                                 |
| Peptic digest of animal tissue             | g/L        |                                                                              |                                                 | 10.0                                                              |                                                          | 10.0                                                                            |
| Peptone and yeast extract                  | g/L        |                                                                              |                                                 |                                                                   | 8.0                                                      |                                                                                 |
| Yeast extract                              | g/L        |                                                                              |                                                 | 4.0                                                               |                                                          | 4.0                                                                             |
| Mannitol                                   | g/L        | 10.0                                                                         | 10.0                                            |                                                                   |                                                          |                                                                                 |
| Sodium chloride                            | g/L        | 10.0                                                                         | 10.0                                            |                                                                   | 10.0                                                     | 4.0                                                                             |
| Sodium pyruvate                            | g/L        |                                                                              |                                                 | 10.0                                                              |                                                          |                                                                                 |
| Di-sodium hydrogen phosphate               | g/L        |                                                                              |                                                 | 2.52                                                              |                                                          |                                                                                 |
| Phosphate-buffer                           | g/L        |                                                                              |                                                 |                                                                   |                                                          | 10.0                                                                            |
| Potassium di-hydrogen phosphate            | g/L        |                                                                              |                                                 | 0.28                                                              |                                                          |                                                                                 |
| Phenol red                                 | g/L        | 0.025                                                                        | 0.025                                           |                                                                   |                                                          |                                                                                 |
| Egg yolk emulsion                          | mL/L       | 100                                                                          |                                                 |                                                                   |                                                          |                                                                                 |
| Phospholipids                              | n.s.       |                                                                              |                                                 |                                                                   | n.s.                                                     | n.s.                                                                            |
| Chromogenic mix (X-glucopyranoside)        | g/L        |                                                                              | 3.2                                             | 1.2                                                               | 0.3                                                      | 1.2                                                                             |
| Chromogenic substrate                      | g/L        |                                                                              |                                                 |                                                                   |                                                          | 0.05                                                                            |
| Selective mix                              | g/L        |                                                                              |                                                 |                                                                   | 3.0                                                      |                                                                                 |
| Antibiotic mix                             | g/L        |                                                                              |                                                 |                                                                   |                                                          | 0.26                                                                            |
| Polymyxin B                                | mg/L, IU/L | 100,000 IU                                                                   | 10.0                                            | 106,000 IU                                                        |                                                          |                                                                                 |
| Bacitracin                                 | mg/L       |                                                                              | 10.0                                            |                                                                   |                                                          |                                                                                 |
| Trimethoprim                               | mg/L       |                                                                              |                                                 | 10.0                                                              |                                                          |                                                                                 |
| pH (25 °C)                                 |            | 7.2 ± 0.2                                                                    | 7.1 ± 0.2                                       | 7.2 ± 0.2                                                         | 6.8 ± 0.2                                                | 7.2 ± 0.2                                                                       |
| <i>Reactions tested</i>                    |            | Mannitol fermentation, phospholipase C (PLC) activity                        | Mannitol fermentation, β-D-glucosidase activity | β-D-glucosidase activity                                          | β-D-glucosidase activity, phospholipase C (PLC) activity | Enzymatic cleavage of the chromogenic substrate, phospholipase C (PLC) activity |
| <i>Typical morphology</i>                  |            | Bright pink colonies surrounded by a zone of egg yolk precipitation ("halo") | Light blue, large, flat colonies                | Blue/green colonies (white if strain is β-D-glucosidase negative) | Blue colonies with white opacification halo              | Pink/orange with opacification halo                                             |
| <i>Incubation conditions (aerobically)</i> |            | 30 °C for 18–48 h                                                            | 30 °C for 24–48 h                               | 37 °C for 24 h                                                    | 30 °C for 18–24 h                                        | 37 °C for 24 h                                                                  |

Sources: <https://www.sigmaldrich.com>; <http://www.oxoid.com>; <https://www.chromagar.com/>; [https://www.biomerieux-usa.com/sites/subsidiary\\_us/files/bacara\\_sales\\_flyer.pdf](https://www.biomerieux-usa.com/sites/subsidiary_us/files/bacara_sales_flyer.pdf). Abbreviations: n.s. — not specified, the grey color indicates absent components in the corresponding agar formulation.

**Supplementary Table S2.** Inclusivity test strains ( $n = 110$ ).

| ID     | Species                        | Strain     | Category                   | Source                   | <i>panC</i> | Tox |
|--------|--------------------------------|------------|----------------------------|--------------------------|-------------|-----|
| BCG 4  | <i>Bacillus pseudomycoides</i> | WS 3119    | Soil                       | Soil                     | I           | C   |
| BC 1   | <i>Bacillus cereus</i>         | C/1        | Milk & dairy products      | Pasteurized milk, retail | II          | F   |
| BC 5   | <i>Bacillus cereus</i>         | F2404B/79  | Diarrheal outbreak         | Unknown                  | II          | F   |
| BC 45  | <i>Bacillus cereus</i>         | K195       | Milk & dairy products      | Pasteurized milk         | II          | C   |
| BC 50  | <i>Bacillus cereus</i>         | K341       | Milk & dairy products      | Pasteurized milk         | II          | F   |
| BC 93  | <i>Bacillus cereus</i>         | EFBC 32    | Mushrooms                  | Dried black mushrooms    | II          | F   |
| BC 122 | <i>Bacillus cereus</i>         | K194       | Milk & dairy products      | Pasteurized milk         | II          | C   |
| BC 126 | <i>Bacillus cereus</i>         | K620       | Milk & dairy products      | Raw milk                 | II          | C   |
| BC 128 | <i>Bacillus cereus</i>         | K781       | Milk & dairy products      | Pasteurized milk         | II          | C   |
| BC 2   | <i>Bacillus cereus</i>         | F3003/73   | Diarrheal outbreak         | Unknown                  | III         | F   |
| BC 6   | <i>Bacillus cereus</i>         | F3350/87   | Emetic outbreak            | Unknown                  | III         | E   |
| BC 7   | <i>Bacillus thuringiensis</i>  | F4429/71   | Diarrheal outbreak         | Vanilla pudding          | III         | D   |
| BC 8   | <i>Bacillus cereus</i>         | MHI 87     | Emetic outbreak            | Baby food                | III         | E   |
| BC 9   | <i>Bacillus cereus</i>         | MHI 135    | Emetic outbreak            | Baby food                | III         | E   |
| BC 10  | <i>Bacillus cereus</i>         | MHI 280    | Emetic outbreak            | Unknown                  | III         | E   |
| BC 11  | <i>Bacillus cereus</i>         | MHI 297    | Emetic outbreak            | Unknown                  | III         | E   |
| BC 12  | <i>Bacillus cereus</i>         | NVH0861-00 | Diarrheal outbreak         | Soft ice                 | III         | F   |
| BC 13  | <i>Bacillus cereus</i>         | RIVM-BC51  | Emetic outbreak            | Rice dish                | III         | E   |
| BC 24  | <i>Bacillus cereus</i>         | Numico     | Milk & dairy products      | Milk powder              | III         | F   |
| BC 58  | <i>Bacillus thuringiensis</i>  | EFBC 1     | Milk & dairy products      | Feta                     | III         | D   |
| BC 60  | <i>Bacillus thuringiensis</i>  | EFBC 4     | Milk & dairy products      | Feta                     | III         | G   |
| BC 62  | <i>Bacillus cereus</i>         | EFBC 8     | Spices                     | Orange pepper            | III         | A   |
| BC 66  | <i>Bacillus cereus</i>         | EFBC 5     | Milk & dairy products      | Feta                     | III         | D   |
| BC 67  | <i>Bacillus thuringiensis</i>  | EFBC 6     | Milk & dairy products      | Feta                     | III         | D   |
| BC 68  | <i>Bacillus thuringiensis</i>  | EFBC 10    | Spices                     | Orange pepper            | III         | F   |
| BC 71  | <i>Bacillus cereus</i>         | EFBC 15    | Fruits & vegetables        | Water pennywort          | III         | D   |
| BC 72  | <i>Bacillus thuringiensis</i>  | EFBC 16    | Fruits & vegetables        | Chinese water spinach    | III         | F   |
| BC 73  | <i>Bacillus thuringiensis</i>  | EFBC 17    | Fish & fishery products    | Dried crayfish           | III         | F   |
| BC 75  | <i>Bacillus thuringiensis</i>  | EFBC 19    | Spices                     | Dried pepper soup        | III         | F   |
| BC 76  | <i>Bacillus thuringiensis</i>  | EFBC 20    | Nuts, nut products & seeds | Ground egusi             | III         | D   |
| BC 77  | <i>Bacillus thuringiensis</i>  | EFBC 21    | Cereals & pastries         | Rice flakes              | III         | F   |
| BC 79  | <i>Bacillus cereus</i>         | EFBC 42    | Mushrooms                  | Dried black mushrooms    | III         | D   |
| BC 81  | <i>Bacillus thuringiensis</i>  | EFBC 45    | Fish & fishery products    | Dried salted anchovies   | III         | F   |
| BC 83  | <i>Bacillus cereus</i>         | EFBC 39    | Tea                        | Bitter melon tea         | III         | A   |
| BC 84  | <i>Bacillus cereus</i>         | EFBC 38    | Tea                        | Bitter melon tea         | III         | A   |
| BC 86  | <i>Bacillus cereus</i>         | EFBC 41    | Nuts, nut products & seeds | Ground egusi             | III         | A   |
| BC 87  | <i>Bacillus cereus</i>         | EFBC 26    | Fish & fishery products    | Dried salted anchovies   | III         | D   |
| BC 89  | <i>Bacillus cereus</i>         | EFBC 25    | Fish & fishery products    | Dried shrimps            | III         | D   |
| BC 91  | <i>Bacillus thuringiensis</i>  | EFBC 30    | Mushrooms                  | Shiitake mushrooms       | III         | D   |
| BC 94  | <i>Bacillus cereus</i>         | EFBC 36    | Nuts, nut products & seeds | Saté peanut sauce        | III         | D   |
| BC 127 | <i>Bacillus thuringiensis</i>  | K760       | Milk & dairy products      | Pasteurized milk         | III         | C   |
| BCG 10 | <i>Bacillus cereus</i>         | EFBC 18    | Mushrooms                  | Dried black mushrooms    | III         | A   |
| BCG 62 | <i>Bacillus cereus</i>         | EFBC 56    | Mushrooms                  | Dried black mushrooms    | III         | D   |
| BC 15  | <i>Bacillus cereus</i>         | WSBC 10028 | Milk & dairy products      | Pasteurized milk         | IV          | A   |
| BC 17  | <i>Bacillus cereus</i>         | WSBC 10201 | Milk & dairy products      | Pasteurized milk         | IV          | A   |

|        |                               |            |                       |                         |    |   |
|--------|-------------------------------|------------|-----------------------|-------------------------|----|---|
| BC 22  | <i>Bacillus cereus</i>        | ATCC 11778 | Unknown               | Unknown                 | IV | D |
| BC 23  | <i>Bacillus cereus</i>        | DSM 31     | Unknown               | Unknown                 | IV | A |
| BC 28  | <i>Bacillus thuringiensis</i> | NCTC 7464  | Unknown               | Unknown                 | IV | A |
| BC 29  | <i>Bacillus cereus</i>        | K3         | Milk & dairy products | Raw milk                | IV | A |
| BC 30  | <i>Bacillus cereus</i>        | K7         | Milk & dairy products | Raw milk                | IV | A |
| BC 31  | <i>Bacillus cereus</i>        | K14        | Milk & dairy products | Raw milk                | IV | A |
| BC 32  | <i>Bacillus cereus</i>        | K20        | Milk & dairy products | Raw milk                | IV | C |
| BC 33  | <i>Bacillus cereus</i>        | K27        | Milk & dairy products | Raw milk                | IV | C |
| BC 44  | <i>Bacillus thuringiensis</i> | K193       | Milk & dairy products | Raw milk                | IV | A |
| BC 61  | <i>Bacillus thuringiensis</i> | EFBC 7     | Spices                | Saatar spice            | IV | A |
| BC 63  | <i>Bacillus thuringiensis</i> | EFBC 9     | Spices                | Orange pepper           | IV | D |
| BC 64  | <i>Bacillus thuringiensis</i> | EFBC 12    | Fruits & vegetables   | Dried apricots          | IV | C |
| BC 65  | <i>Bacillus thuringiensis</i> | F1         | Delicacies            | Spread                  | IV | D |
| BC 69  | <i>Bacillus thuringiensis</i> | EFBC 11    | Fruits & vegetables   | Dried apricots          | IV | C |
| BC 70  | <i>Bacillus cereus</i>        | EFBC 14    | Fruits & vegetables   | Okra                    | IV | A |
| BC 78  | <i>Bacillus thuringiensis</i> | EFBC 22    | Cereals & pastries    | Rice flakes             | IV | A |
| BC 82  | <i>Bacillus thuringiensis</i> | EFBC 37    | Tea                   | Vietnamese green tea    | IV | A |
| BC 85  | <i>Bacillus cereus</i>        | EFBC 40    | Spices                | Fish Hara seasoning mix | IV | A |
| BC 88  | <i>Bacillus thuringiensis</i> | EFBC 35    | Tea                   | Bitter melon tea        | IV | A |
| BC 90  | <i>Bacillus thuringiensis</i> | EFBC 29    | Mushrooms             | Shiitake mushrooms      | IV | A |
| BC 92  | <i>Bacillus cereus</i>        | EFBC 31    | Mushrooms             | Dried white mushrooms   | IV | A |
| BC 95  | <i>Bacillus thuringiensis</i> | EFBC 33    | Tea                   | Vietnamese green tea    | IV | A |
| BC 100 | <i>Bacillus cereus</i>        | K12        | Milk & dairy products | Raw milk                | IV | A |
| BC 101 | <i>Bacillus cereus</i>        | K16        | Milk & dairy products | Raw milk                | IV | A |
| BC 102 | <i>Bacillus cereus</i>        | K18        | Milk & dairy products | Raw milk                | IV | A |
| BC 103 | <i>Bacillus cereus</i>        | K31        | Milk & dairy products | Raw milk                | IV | A |
| BC 104 | <i>Bacillus cereus</i>        | K22        | Milk & dairy products | Raw milk                | IV | D |
| BC 105 | <i>Bacillus cereus</i>        | K2         | Milk & dairy products | Raw milk                | IV | D |
| BC 106 | <i>Bacillus cereus</i>        | K4         | Milk & dairy products | Raw milk                | IV | A |
| BCG 12 | <i>Bacillus cereus</i>        | EFBG 41    | Tea                   | Bitter melon tea        | IV | A |
| BCG 63 | <i>Bacillus thuringiensis</i> | 68-1       | Mushrooms             | Shiitake mushrooms      | IV | A |
| BC 25  | <i>Bacillus toyonensis</i>    | S4-1       | Fruits & vegetables   | Prewashed salad         | V  | C |
| BC 26  | <i>Bacillus thuringiensis</i> | S26-1      | Fruits & vegetables   | Prewashed salad         | V  | C |
| BC 38  | <i>Bacillus toyonensis</i>    | K49        | Milk & dairy products | Raw milk                | V  | C |
| BC 80  | <i>Bacillus thuringiensis</i> | EFBC 44    | Fresh herbs           | Coriander               | V  | C |
| BC 118 | <i>Bacillus toyonensis</i>    | K50        | Milk & dairy products | Raw milk                | V  | C |
| BC 129 | <i>Bacillus thuringiensis</i> | 890        | Milk & dairy products | Pasteurized milk        | V  | F |
| BC 130 | <i>Bacillus toyonensis</i>    | K923       | Milk & dairy products | Pasteurized milk        | V  | C |
| BCG 6  | <i>Bacillus toyonensis</i>    | S16-1      | Fruits & vegetables   | Prewashed salad         | V  | C |
| BCG 7  | <i>Bacillus thuringiensis</i> | S21-1      | Fruits & vegetables   | Prewashed salad         | V  | F |
| BCG 8  | <i>Bacillus toyonensis</i>    | S36-1      | Fruits & vegetables   | Prewashed salad         | V  | C |
| BCG 11 | <i>Bacillus toyonensis</i>    | EFBC 43    | Mushrooms             | Mu-Err mushrooms        | V  | D |
| BCG 22 | <i>Bacillus thuringiensis</i> | CCM 1462   | Unknown               | Unknown                 | V  | D |
| BC 14  | <i>Bacillus mycoides</i>      | SDA MA57   | Milk & dairy products | Raw milk                | VI | C |
| BC 19  | <i>Bacillus mycoides</i>      | WSBC 10207 | Milk & dairy products | Pasteurized milk        | VI | F |
| BC 20  | <i>Bacillus mycoides</i>      | WSBC 10377 | Milk & dairy products | Raw milk                | VI | C |
| BC 21  | <i>Bacillus mycoides</i>      | WSBC 10208 | Milk & dairy products | Pasteurized milk        | VI | C |
| BC 27  | <i>Bacillus mycoides</i>      | S73-2      | Fruits & vegetables   | Prewashed salad         | VI | C |
| BC 34  | <i>Bacillus mycoides</i>      | K32        | Milk & dairy products | Raw milk                | VI | A |

|        |                                    |            |                       |                 |    |   |
|--------|------------------------------------|------------|-----------------------|-----------------|----|---|
| BC 35  | <i>Bacillus mycoides</i>           | K41        | Milk & dairy products | Raw milk        | VI | C |
| BC 36  | <i>Bacillus weihenstephanensis</i> | K43        | Milk & dairy products | Raw milk        | VI | C |
| BC 37  | <i>Bacillus mycoides</i>           | K45        | Milk & dairy products | Raw milk        | VI | C |
| BC 39  | <i>Bacillus mycoides</i>           | K57        | Milk & dairy products | Raw milk        | VI | C |
| BC 108 | <i>Bacillus mycoides</i>           | K58        | Milk & dairy products | Raw milk        | VI | C |
| BC 110 | <i>Bacillus mycoides</i>           | K38        | Milk & dairy products | Raw milk        | VI | C |
| BC 111 | <i>Bacillus mycoides</i>           | K34        | Milk & dairy products | Raw milk        | VI | C |
| BC 112 | <i>Bacillus mycoides</i>           | K37        | Milk & dairy products | Raw milk        | VI | C |
| BC 113 | <i>Bacillus mycoides</i>           | K42        | Milk & dairy products | Raw milk        | VI | C |
| BC 116 | <i>Bacillus mycoides</i>           | K46        | Milk & dairy products | Raw milk        | VI | C |
| BC 117 | <i>Bacillus mycoides</i>           | K48        | Milk & dairy products | Raw milk        | VI | C |
| BCG 1  | <i>Bacillus mycoides</i>           | KBAB4      | Soil                  | Soil            | VI | C |
| BCG 2  | <i>Bacillus mycoides</i>           | MC67       | Soil                  | Soil            | VI | C |
| BCG 3  | <i>Bacillus weihenstephanensis</i> | WSBC 10204 | Milk & dairy products | Raw milk        | VI | C |
| BCG 9  | <i>Bacillus mycoides</i>           | S49-2      | Fruits & vegetables   | Prewashed salad | VI | C |
| BCG 32 | <i>Bacillus mycoides</i>           | S13-2      | Fruits & vegetables   | Prewashed salad | VI | F |

Abbreviations: *panC* — *panC* group; Tox — toxin gene profile; POS — positive reaction; NEG — negative reaction; A — toxin profile A (*nhe+/hbl+/cytK+*); C — toxin profile C (*nhe+/hbl+*); D — toxin profile D (*nhe+/cytK+*); E — toxin profile E (*nhe+/ces+*); F — toxin profile F (*nhe+*); II — *panC* group II (highly cytotoxic, growth  $\geq 7^{\circ}\text{C}$ ); III — *panC* group III (highly cytotoxic, growth  $\geq 15^{\circ}\text{C}$ ); IV — *panC* group IV (highly cytotoxic, growth  $\geq 10^{\circ}\text{C}$ ); V — *panC* group V (low cytotoxic, growth  $\geq 8^{\circ}\text{C}$ ); VI — *panC* group VI (not or little cytotoxic; growth  $\geq 5^{\circ}\text{C}$ ).

**Supplementary Table S3.** Exclusivity test strains ( $n = 110$ ).

| ID     | Strain     | Category                    | Source                        | Species                              |
|--------|------------|-----------------------------|-------------------------------|--------------------------------------|
| BG 13  | 10; V/05   | Fish & fishery products     | Smoked salmon                 | <i>Bacillus circulans</i>            |
| BG 14  | 9; V/06    | Fish & fishery products     | Smoked salmon                 | <i>Bacillus circulans</i>            |
| BG 15  | BS         | Vegetarian meat substitutes | Vegetarian sausage            | <i>Bacillus circulans</i>            |
| BG 16  | 5 V/05     | Fish & fishery products     | Smoked salmon                 | <i>Bacillus circulans</i>            |
| BG 18  | BS         | Vegetarian meat substitutes | Vegetarian sausage            | <i>Bacillus clausii</i>              |
| BG 19  | DSM 9      | Environment                 | Soil                          | <i>Bacillus lentus</i>               |
| BG 20  | CCM 2145   | Unknown                     | Unknown                       | <i>Bacillus licheniformis</i>        |
| BG 23  | CCM 2144   | Unknown                     | Unknown                       | <i>Bacillus pumilus</i>              |
| BG 24  | BS         | Vegetarian meat substitutes | Vegetarian sausage            | <i>Bacillus pumilus</i>              |
| BG 26  | BF47=25    | Meat & meat products        | Raw sausage                   | <i>Bacillus pumilus</i>              |
| BG 27  | AGES CCHX3 | Milk & dairy products       | ESL-milk                      | <i>Bacillus safensis</i>             |
| BG 28  | BS         | Vegetarian meat substitutes | Vegetarian sausage            | <i>Bacillus stratosphericus</i>      |
| BG 29  | BS         | Vegetarian meat substitutes | Vegetarian sausage            | <i>Bacillus subtilis</i>             |
| BG 30  | NCTC 10400 | Unknown                     | Unknown                       | <i>Bacillus subtilis</i>             |
| BG 31  | 2; V/05    | Fish & fishery products     | Smoked salmon                 | <i>Bacillus oleronius</i>            |
| BG 33  | BS         | Vegetarian meat substitutes | Vegetarian sausage            | <i>Oceanobacillus polygoni</i>       |
| BG 34  | JB         | Milk & dairy products       | Raw milk                      | <i>Paenibacillus peoriae</i>         |
| BG 35  | DSM 36     | Unknown                     | Unknown                       | <i>Paenibacillus polymyxa</i>        |
| BG 36  | 9-2        | Milk & dairy products       | Goat cheese                   | <i>Lysinibacillus boronitolerans</i> |
| BG 37  | 13-1       | Spices                      | Curry powder                  | <i>Brevibacillus halotolerans</i>    |
| BG 38  | 13-1       | Spices                      | Curry powder                  | <i>Bacillus amyloliquefaciens</i>    |
| BG 39  | 14-1       | Spices                      | Paprika flakes                | <i>Bacillus amyloliquefaciens</i>    |
| BG 40  | 14-2       | Spices                      | Paprika flakes                | <i>Bacillus amyloliquefaciens</i>    |
| BG 41  | 17-1       | Spices                      | Kebab spice                   | <i>Bacillus amyloliquefaciens</i>    |
| BG 43  | 19-1       | Fruits & vegetables         | Apricots                      | <i>Brevibacillus laterosporus</i>    |
| BG 44  | E1         | Delicacies                  | Spread                        | <i>Bacillus subtilis</i>             |
| BG 45  | E3         | Delicacies                  | Spread                        | <i>Bacillus subtilis</i>             |
| BG 46  | F2         | Delicacies                  | Spread                        | <i>Bacillus safensis</i>             |
| BG 47  | 3-1        | Delicacies                  | Stuffed vine leaves           | <i>Bacillus safensis</i>             |
| BG 48  | 4-1        | Delicacies                  | Black olives                  | <i>Bacillus paralicheniformis</i>    |
| BG 49  | 6-1        | Delicacies                  | Aubergine salad               | <i>Bacillus amyloliquefaciens</i>    |
| BG 50  | 11-1       | Meat & meat products        | Brawn                         | <i>Bacillus safensis</i>             |
| BG 51  | 13-1       | Spices                      | Curry powder                  | <i>Bacillus tequilensis</i>          |
| BG 52  | 14-1       | Spices                      | Paprika flakes                | <i>Bacillus amyloliquefaciens</i>    |
| BG 53  | 16-1       | Spices                      | Saatar spice                  | <i>Bacillus tequilensis</i>          |
| BG 54  | 16-1       | Spices                      | Saatar spice                  | <i>Bacillus safensis</i>             |
| BG 55  | 17-2       | Spices                      | Kebab spice                   | <i>Bacillus safensis</i>             |
| BG 56  | 18-1       | Spices                      | Orange pepper                 | <i>Bacillus amyloliquefaciens</i>    |
| BG 57  | 19-1       | Fruits & vegetables         | Apricots                      | <i>Bacillus mojavensis</i>           |
| BG 58  | 20         | Milk & dairy products       | Livanjski Sir cheese          | <i>Lysinibacillus fusiformis</i>     |
| BG 59  | 21         | Meat & meat products        | Suho Meso (smoked dried beef) | <i>Bacillus paralicheniformis</i>    |
| BG 60  | 41         | Nuts, nut products & seeds  | Pomegranate seeds             | <i>Bacillus paralicheniformis</i>    |
| BG 61  | 43         | Nuts, nut products & seeds  | Sunflower seeds               | <i>Bacillus paralicheniformis</i>    |
| BG 62  | 6; 56/1900 | Milk & dairy products       | Cheese smear                  | <i>Oceanobacillus oncorhynchi</i>    |
| EGN 2  | DSM 3007   | Clinical isolate            | Urine                         | <i>Acinetobacter baumannii</i>       |
| EGN 3  | NCTC 5866  | Unknown                     | Unknown                       | <i>Acinetobacter iwoffii</i>         |
| EGN 4  | BF24       | Clinical isolate            | Blood culture                 | <i>Aeromonas caviae</i>              |
| EGN 5  | NCTC 8049  | Milk & dairy products       | Tin of milk with a fishy odor | <i>Aeromonas hydrophila</i>          |
| EGN 7  | CCM 4706   | Clinical isolate            | Rumen of bull                 | <i>Citrobacter amalonaticus</i>      |
| EGN 8  | DSM 30040  | Clinical isolate            | Faeces                        | <i>Citrobacter braakii</i>           |
| EGN 9  | NCTC 9750  | Unknown                     | Unknown                       | <i>Citrobacter freundii</i>          |
| EGN 11 | CCM 2537   | Clinical isolate            | Blood culture                 | <i>Citrobacter koseri</i>            |
| EGN 13 | DSM 17578  | Meat & meat products        | Meat scraps                   | <i>Citrobacter youngae</i>           |
| EGN 14 | Cro1       | Milk & dairy products       | Milk powder                   | <i>Cronobacter sakazakii</i>         |
| EGN 21 | DSM 30053  | Clinical isolate            | Sputum                        | <i>Klebsiella aerogenes</i>          |
| EGN 22 | DSM 26481  | Unknown                     | Unknown                       | <i>Enterobacter cloacae</i>          |
| EGN 28 | DSM 3493   | Clinical isolate            | Human knee lactation          | <i>Pantoea agglomerans</i>           |

|        |                 |                             |                                         |                                     |
|--------|-----------------|-----------------------------|-----------------------------------------|-------------------------------------|
| EGN 31 | ATCC 25922      | Clinical isolate            | Unknown                                 | <i>Escherichia coli</i>             |
| EGN 32 | ATCC 35150      | Clinical isolate            | Human feces                             | <i>Escherichia coli</i>             |
| EGN 33 | ATCC 43895      | Meat & meat products        | Raw hamburger meat                      | <i>Escherichia coli</i>             |
| EGN 34 | DSM 30163       | Unknown                     | Unknown                                 | <i>Hafrnia alvei</i>                |
| EGN 35 | NCTC 9528       | Milk & dairy products       | Butter                                  | <i>Raoultella planticola</i>        |
| EGN 36 | DSMZ 5175       | Clinical isolate            | Pharyngeal tonsil                       | <i>Klebsiella oxytoca</i>           |
| EGN 37 | JCM 7251        | Fruits & vegetables         | Radish root                             | <i>Raoultella planticola</i>        |
| EGN 39 | DSM 6675        | Clinical isolate            | Stool of infant                         | <i>Morganella morganii</i>          |
| EGN 40 | DSM 4479        | Unknown                     | Unknown                                 | <i>Proteus mirabilis</i>            |
| EGN 41 | NCTC 10975      | Clinical isolate            | Human urine                             | <i>Proteus mirabilis</i>            |
| EGN 42 | NCTC 7475       | Clinical isolate            | Human faeces                            | <i>Providencia rettgeri</i>         |
| EGN 43 | ATCC 13315      | Unknown                     | Unknown                                 | <i>Proteus hauseri</i>              |
| EGN 44 | DSM 6676        | Clinical isolate            | Faeces of infant                        | <i>Providencia stuartii</i>         |
| EGN 45 | NCTC 10038      | Environment                 | Freshwater pre-filter tanks             | <i>Pseudomonas fluorescens</i>      |
| EGN 46 | NCTC 10662      | Clinical isolate            | Unknown                                 | <i>Pseudomonas aeruginosa</i>       |
| EGN 48 | DSM 50342       | Environment                 | Swimming-pool water                     | <i>Pseudomonas alcaligenes</i>      |
| EGN 49 | NCTC 10661      | Environment                 | Forest soil                             | <i>Burkholderia cepacia</i>         |
| EGN 50 | DSM 1635        | Unknown                     | Contaminant of <i>B. cereus</i> culture | <i>Brevundimonas dimenuta</i>       |
| EGN 53 | DSM 554         | Unknown                     | Unknown                                 | <i>Salmonella enterica</i>          |
| EGN 54 | NCTC 11935      | Unknown                     | Unknown                                 | <i>Serratia marcescens</i>          |
| EGN 55 | ATCC 8100       | Unknown                     | Unknown                                 | <i>Serratia marcescens</i>          |
| EGN 56 | ATCC 12022      | Unknown                     | Unknown                                 | <i>Shigella flexneri</i>            |
| EGN 57 | NCTC 8574       | Unknown                     | Unknown                                 | <i>Shigella sonnei</i>              |
| EGN 64 | DSM 18506       | Fish & fishery products     | Trout with red-mouth disease            | <i>Yersinia ruckeri</i>             |
| EGP 1  | DSM 20124       | Unknown                     | Unknown                                 | <i>Arthrobacter globiformis</i>     |
| EGP 2  | DSM 20599       | Meat & meat products        | Bacon                                   | <i>Brochothrix thermosphacta</i>    |
| EGP 3  | DSM 20109       | Unknown                     | Unknown                                 | <i>Cellulomonas flavigena</i>       |
| EGP 4  | CCM 1875        | Unknown                     | Unknown                                 | <i>Enterococcus faecalis</i>        |
| EGP 5  | CCM 4224        | Clinical isolate            | Urine                                   | <i>Enterococcus faecalis</i>        |
| EGP 6  | CCM 3321        | Environment                 | Milking machine                         | <i>Kurthia gibsonii</i>             |
| EGP 7  | DSM 20580       | Clinical isolate            | Turkey caecum                           | <i>Kurthia zopfii</i>               |
| EGP 8  | LMG 6907=BF17   | Milk & dairy products       | Raw milk                                | <i>Lactobacillus plantarum</i>      |
| EGP 9  | 1A              | Milk & dairy products       | Raw milk                                | <i>Staphylococcus chromogenes</i>   |
| EGP 10 | 2A              | Milk & dairy products       | Raw milk                                | <i>Staphylococcus cohnii</i>        |
| EGP 11 | 17B             | Milk & dairy products       | Raw milk                                | <i>Staphylococcus haemolyticus</i>  |
| EGP 12 | 7B              | Milk & dairy products       | Raw milk                                | <i>Staphylococcus intermedius</i>   |
| EGP 13 | 24; BF46        | Meat & meat products        | Meat loaf                               | <i>Staphylococcus sciuri</i>        |
| EGP 19 | 1.1.            | Vegetarian meat substitutes | Vegetarian sausage                      | <i>Lactobacillus plantarum</i>      |
| EGP 20 | 1               | Vegetarian meat substitutes | Vegetarian sausage                      | <i>Lactobacillus sakei</i>          |
| EGP 21 | 1,2             | Environment                 | Cheese processing environment           | <i>Leuconostoc carnosum</i>         |
| EGP 22 | 6KMS            | Vegetarian meat substitutes | Vegetarian sausage                      | <i>Listeria monocytogenes</i>       |
| EGP 23 | 7,2             | Vegetarian meat substitutes | Vegetarian sausage                      | <i>Pediococcus pentosaceus</i>      |
| EGP 24 | ATCC 25923      | Clinical isolate            | Unknown                                 | <i>Staphylococcus aureus</i>        |
| EGP 25 | 12 V/05         | Milk & dairy products       | Raw milk                                | <i>Staphylococcus aureus</i>        |
| EGP 26 | 6B              | Vegetarian meat substitutes | Vegetarian sausage                      | <i>Staphylococcus auricularis</i>   |
| EGP 27 | 2,1             | Milk & dairy products       | Raw milk                                | <i>Staphylococcus carnosus</i>      |
| EGP 30 | 6A              | Milk & dairy products       | Raw milk                                | <i>Staphylococcus epidermidis</i>   |
| EGP 33 | 19 (105)        | Fish & fishery products     | Shrimps                                 | <i>Staphylococcus saprophyticus</i> |
| EGP 35 | Ocla 18 (6)     | Milk & dairy products       | Raw milk                                | <i>Micrococcus aloeverae</i>        |
| EGP 36 | CCM 2730        | Clinical isolate            | Human skin                              | <i>Staphylococcus warneri</i>       |
| EGP 37 | 16 (96)         | Fish & fishery products     | Frozen fish                             | <i>Staphylococcus xylosus</i>       |
| EGP 39 | 20B             | Fish & fishery products     | Fish                                    | <i>Staphylococcus xylosus</i>       |
| EGP 40 | 53/4 (7) orange | Milk a& dairy products      | Cheese smear                            | <i>Microbacterium arborescens</i>   |

**Supplementary Table S4A.** Background information on naturally contaminated food samples.

| Isolate ID | Producer | Category                   | Source                 |
|------------|----------|----------------------------|------------------------|
| 75         | A        | Tea                        | Vietnamese green tea   |
| 36         | B        | Fish & fishery products    | Dried crayfish         |
| 35         | C        | Fish & fishery products    | Dried lizardfish       |
| 37         | D        | Fish & fishery products    | Dried salted anchovies |
| 66         | E        | Fish & fishery products    | Dried salted anchovies |
| 32         | E        | Fruits & vegetables        | Pandan leaves          |
| 38         | E        | Fruits & vegetables        | Tamarind paste, moist  |
| 105        | F        | Spices                     | Coriander powder       |
| 33         | F        | Fruits & vegetables        | Bean sprouts           |
| 40         | F        | Fruits & vegetables        | Goji berries           |
| 34         | G        | Fruits & vegetables        | Galanga root           |
| 41         | G        | Nuts, nut products & seeds | Pomegranate seeds      |
| 47         | G        | Nuts, nut products & seeds | Ground egusi           |

Background information on naturally contaminated food samples

**Supplementary Table S4B.** Background information on naturally contaminated milk samples.

| Isolate ID | Producer | Sample      | Processing     | Husbandry |
|------------|----------|-------------|----------------|-----------|
| 4          | H        | Cow milk    | PM, NHOM       | ORG, HAY  |
| 42         | H        | Cow milk    | PM, NHOM       | ORG, HAY  |
| 70         | H        | Cow milk    | PM, NHOM       | ORG, HAY  |
| 11-D       | I        | Cow milk    | PM, NHOM       | ORG       |
| 41         | I        | Cow milk    | PM, NHOM       | ORG       |
| 71         | I        | Cow milk    | PM, NHOM       | ORG       |
| 12         | J        | Cow milk    | PM-ESL, MICROF | ORG       |
| 16         | J        | Cow milk    | PM, NHOM       | ORG       |
| 17         | J        | Cow milk    | PM, NHOM       | ORG       |
| 84         | J        | Cow milk    | PM, NHOM       | ORG       |
| 27         | K        | Bactofugate | RAW            | CONV      |
| 64         | K        | Buttermilk  | PM             | ORG       |
| 85         | K        | Cow milk    | PM-ESL, MICROF | ORG       |
| 139        | K        | Cow milk    | HM-ESL         | ORG       |
| 141        | K        | Cow milk    | HM-ESL         | ORG       |
| 73         | L        | Cow milk    | PM-ESL, MICROF | CONV      |
| 74         | L        | Cow milk    | PM-ESL, MICROF | CONV      |
| 75         | L        | Cow milk    | PM-ESL, MICROF | CONV      |
| 2          | M        | Cow milk    | PM-ESL, MICROF | ORG       |
| 13         | M        | Cow milk    | PM-ESL, MICROF | ORG       |
| 15         | M        | Cow milk    | PM-ESL, MICROF | ORG       |
| 76         | M        | Cow milk    | PM-ESL, MICROF | ORG       |
| 120        | M        | Cow milk    | HM-ESL         | ORG       |
| 123        | M        | Cow milk    | PM-ESL, MICROF | ORG       |
| 125        | M        | Cow milk    | PM-ESL, MICROF | ORG       |
| 127        | M        | Cow milk    | PM-ESL, MICROF | ORG       |
| 128        | M        | Cow milk    | HM-ESL         | ORG       |
| 129        | M        | Cow milk    | PM-ESL, MICROF | ORG       |
| 130        | M        | Cow milk    | HM-ESL         | ORG       |
| 131        | M        | Cow milk    | PM-ESL, MICROF | ORG       |
| 132        | M        | Cow milk    | PM-ESL, MICROF | ORG       |
| 68         | N        | Cow milk    | HM-ESL         | ORG       |
| 77         | N        | Cow milk    | PM-ESL, MICROF | ORG       |
| 72         | O        | Cow milk    | PM, NHOM       | ORG       |

|      |   |            |        |      |
|------|---|------------|--------|------|
| 6    | P | Goat milk  | HM-ESL | CONV |
| 5    | Q | Sheep milk | PM     | CONV |
| 45   | Q | Goat milk  | PM     | CONV |
| 78   | Q | Sheep milk | PM     | CONV |
| 88   | Q | Sheep milk | PM     | CONV |
| 100  | Q | Sheep milk | PM     | CONV |
| 1    | R | Sheep milk | HM-ESL | ORG  |
| 8    | R | Sheep milk | HM-ESL | ORG  |
| 9    | R | Goat milk  | HM-ESL | ORG  |
| 11-A | R | Goat milk  | HM-ESL | ORG  |
| 11-B | R | Goat milk  | HM-ESL | ORG  |
| 11-C | R | Goat milk  | HM-ESL | ORG  |
| 43   | R | Goat milk  | HM-ESL | ORG  |
| 44   | R | Sheep milk | HM-ESL | ORG  |
| 65   | R | Goat milk  | HM-ESL | ORG  |
| 66   | R | Sheep milk | HM-ESL | ORG  |
| 67   | R | Sheep milk | HM-ESL | ORG  |

Abbreviations: CONV — conventional husbandry; silage feeding; ESL — extended shelf life; HAY — hay feeding; HM — high-pasteurized milk; MICROF — micro-filtrated; NHOM — non-homogenized milk; PM — pasteurized milk; ORG — organic; RAW — raw milk.



**Supplementary Table S5.** Accordance in the detection of *Bacillus cereus* group in naturally contaminated samples ( $n = 64$ ) before and after freezing on selective agar media.

| Sample ID               | Producer | Sample                    | MYP | MYP | HI | BRI | CH | BA | Accordance |
|-------------------------|----------|---------------------------|-----|-----|----|-----|----|----|------------|
|                         |          |                           | BF  | AF  |    |     |    |    |            |
| 42                      | H        | Cow PM                    | P   | P   | P  | P   | P  | P  | 6          |
| 71                      | I        | Cow PM                    | P   | P   | P  | P   | P  | P  | 6          |
| 84                      | J        | Cow PM                    | P   | P   | P  | P   | P  | P  | 6          |
| 85                      | K        | Cow PM-ESL                | P   | P   | P  | P   | P  | P  | 6          |
| 120; 123; 129; 131; 132 | M        | Cow HM-ESL; Cow PM-ESL    | P   | P   | P  | P   | P  | P  | 6          |
| 45                      | Q        | Goat PM                   | P   | P   | P  | P   | P  | P  | 6          |
| 78; 88; 100             | Q        | Sheep PM                  | P   | P   | P  | P   | P  | P  | 6          |
| 44; 67                  | R        | Sheep HM-ESL              | P   | P   | P  | P   | P  | P  | 6          |
| 12                      | J        | Cow PM-ESL                |     | P   | P  | P   | P  | P  | 5          |
| 139                     | K        | Cow HM-ESL                |     | P   | P  | P   | P  | P  | 5          |
| 125; 128                | M        | Cow HM-ESL; Cow PM-ESL    | P   | P   | P  | P   | P  |    | 5          |
| 43                      | R        | Goat HM-ESL               | P   | P   | P  | P   | P  |    | 5          |
| 65                      | R        | Goat-HM-ESL               | P   | P   | P  | P   |    | P  | 5          |
| 66                      | R        | Sheep HM-ESL              | P   | P   | P  | P   | P  |    | 5          |
| 36                      | B        | Dried crayfish            | P   | P   |    |     | P  | P  | 4          |
| 40                      | F        | Goji berries              |     | P   |    | P   | P  | P  | 4          |
| 34                      | G        | Galanga root              |     | P   |    | P   | P  | P  | 4          |
| 4                       | H        | Cow PM                    | P   | P   | P  |     | P  |    | 4          |
| 141                     | K        | Cow HM-ESL                |     | P   | P  | P   | P  |    | 4          |
| 6                       | P        | Goat HM-ESL               |     | P   |    | P   | P  | P  | 4          |
| 5                       | Q        | Sheep PM                  |     |     | P  | P   | P  | P  | 4          |
| 75                      | A        | Vietnamese green tea      | P   |     | P  |     |    | P  | 3          |
| 37                      | D        | Dried salted anchovies    |     |     |    | P   | P  | P  | 3          |
| 33                      | F        | Bean sprouts              |     |     |    | P   | P  | P  | 3          |
| 41                      | G        | Pomegranate seeds         |     | P   |    |     | P  | P  | 3          |
| 17                      | J        | Cow PM                    |     | P   |    | P   | P  |    | 3          |
| 13                      | M        | Cow PM-ESL                |     |     | P  | P   |    | P  | 3          |
| 72                      | O        | Cow PM                    | P   | P   | P  |     |    |    | 3          |
| 11-C                    | R        | Goat HM-ESL               |     |     |    | P   | P  | P  | 3          |
| 35                      | C        | Dried lizard fish         | P   |     |    |     |    | P  | 2          |
| 66                      | E        | Dried salted anchovies    | P   |     |    |     |    | P  | 2          |
| 47                      | G        | Ground egusi              | P   |     |    |     |    | P  | 2          |
| 16                      | J        | Cow PM                    |     |     |    | P   | P  |    | 2          |
| 15                      | M        | Cow PM-ESL                | P   |     |    | P   |    |    | 2          |
| 127; 130                | M        | Cow PM-ESL                | P   | P   |    |     |    |    | 2          |
| 1                       | R        | Sheep HM-ESL              | P   |     |    |     |    | P  | 2          |
| 8; 9                    | R        | Sheep HM-ESL; Goat HM-ESL |     |     | P  |     |    | P  | 2          |
| 11-A                    | R        | Goat HM-ESL               | P   |     |    |     |    | P  | 2          |

|            |   |                             |   |   |  |  |   |   |   |
|------------|---|-----------------------------|---|---|--|--|---|---|---|
| 32         | E | Pandan leaves               |   |   |  |  | P |   | 1 |
| 32         | E | Pandan leaves               |   |   |  |  | P |   | 1 |
| 38         | E | Tamarind paste              |   | P |  |  |   |   | 1 |
| 105        | F | Coriander powder            | P |   |  |  |   |   | 1 |
| 70         | H | Cow PM                      | P |   |  |  |   |   | 1 |
| 11-D       | I | Cow PM                      |   |   |  |  | P |   | 1 |
| 41         | I | Cow PM                      | P |   |  |  |   |   | 1 |
| 27; 64     | K | Bactofugate RM; Butter milk | P |   |  |  |   |   | 1 |
| 73; 74; 75 | L | Cow PM-ESL                  | P |   |  |  |   |   | 1 |
| 2          | M | Cow PM-ESL                  |   |   |  |  |   | P | 1 |
| 76         | M | Cow PM-ESL                  | P |   |  |  |   |   | 1 |
| 68; 77     | N | Cow HM-ESL; Cow PM-ESL      | P |   |  |  |   |   | 1 |
| 11-B       | R | Goat HM-ESL                 |   | P |  |  |   |   | 1 |

Abbreviations: AF — after freezing; BA — BACARA® agar; BF — before freezing; BRI — Brilliance™ *B. cereus* agar; CH — CHROMagar™ *B. cereus*; HI — ChromoSelect *Bacillus* agar; HM — high-pasteurized/high heat-treated milk; MYP — mannitol egg yolk polymyxin agar; PM — pasteurized milk; RM — raw/not heat-treated milk; Yellow color — before and after freezing positive on MYP agar; Green color — before freezing positive on MYP agar; Blue color— after freezing positive on MYP agar; Grey color-after freezing positive on chromogenic media.

**Supplementary Table S6.** *panC* group and toxin gene profile combinations of *Bacillus cereus* group detected before and after freezing (*n* = 64 samples).

| Sample                 | Producer | BF   |       |      |      | AF    |       |      |      |
|------------------------|----------|------|-------|------|------|-------|-------|------|------|
| Vietnamese green tea   | A        |      |       | IV/A |      |       |       | IV/A |      |
| Dried crayfish         | B        |      | III/F |      |      | III/A | III/C |      |      |
| Dried lizard fish      | C        |      | III/F |      |      | III/A | III/F |      |      |
| Dried salted anchovies | D        |      |       |      |      |       |       | IV/A | VI/C |
| Dried salted anchovies | E        |      | III/D |      |      |       | III/D |      |      |
| Pandan leaves          | E        |      |       |      |      |       | III/F |      |      |
| Tamarind paste         | E        |      |       |      |      |       | III/F |      |      |
| Coriander powder       | F        |      |       | IV/A |      |       |       |      |      |
| Bean sprouts           | F        |      |       |      |      |       |       | IV/A | IV/D |
| Goji berries           | F        |      |       |      |      |       |       | IV/A | IV/D |
| Pomegranate seeds      | G        |      |       |      |      | II/C  |       |      |      |
| Ground egusi           | G        |      | III/D |      |      |       | III/D |      |      |
| Galanga root           | G        |      |       |      |      |       | III/F |      | IV/D |
| Cow PM                 | H        |      |       |      |      | II/C  |       | IV/A |      |
| Cow PM                 | H        | II/F |       | IV/A | VI/A |       |       | IV/A | VI/C |
| Cow PM                 | H        | II/F |       |      | VI/C |       |       |      |      |
| Cow PM                 | I        |      |       |      |      |       |       | IV/A |      |
| Cow PM                 | I        |      |       |      | VI/C |       |       |      |      |
| Cow PM                 | I        |      |       |      | VI/C |       |       |      | VI/C |
| Cow PM-ESL             | J        |      |       |      |      | II/F  |       | IV/A |      |
| Cow PM                 | J        |      |       |      |      | II/F  |       | IV/A |      |
| Cow PM                 | J        |      |       |      |      |       |       |      | VI/C |
| Cow PM                 | J        |      |       | IV/A |      |       |       | IV/A |      |
| Bactofugate RM         | K        |      | III/F |      |      |       |       |      |      |
| Butter milk            | K        |      | III/F |      |      |       |       |      |      |
| Cow PM-ESL             | K        |      |       | IV/A |      |       |       |      | VI/C |
| Cow HM-ESL             | K        |      |       |      |      |       |       | IV/A |      |
| Cow HM-ESL             | K        |      |       |      |      |       |       | IV/A |      |
| Cow PM-ESL             | L        | II/C |       |      |      |       |       |      |      |
| Cow PM-ESL             | L        |      |       |      | VI/C |       |       |      |      |
| Cow PM-ESL             | L        |      |       | IV/A |      |       |       |      |      |
| Cow PM-ESL             | M        |      |       |      |      |       |       | IV/A |      |
| Cow PM-ESL             | M        |      |       |      |      |       |       | IV/A |      |
| Cow PM-ESL             | M        |      |       |      | VI/C |       |       |      | VI/C |
| Cow PM-ESL             | M        |      |       |      | VI/A |       |       |      |      |
| Cow HM-ESL             | M        |      | III/F |      |      |       |       | IV/A |      |
| Cow-PM-ESL             | M        |      | III/F |      |      |       | III/F |      |      |
| Cow-PM-ESL             | M        |      |       | IV/A |      |       |       | IV/A |      |
| Cow PM-ESL             | M        |      | III/D |      |      |       |       |      | VI/C |

|              |   |      |       |      |     |      |      |       |      |  |     |      |
|--------------|---|------|-------|------|-----|------|------|-------|------|--|-----|------|
| Cow HM-ESL   | M |      |       | IV/A |     |      |      |       |      |  | V/C |      |
| Cow PM-ESL   | M |      |       | IV/A |     |      |      |       | IV/A |  |     |      |
| Cow HM-ESL   | M |      |       |      | V/C |      |      |       | IV/A |  |     |      |
| Cow PM-ESL   | M |      | III/F |      |     |      |      | III/F |      |  |     |      |
| Cow PM-ESL   | M |      | III/F |      |     |      |      | III/F |      |  |     |      |
| Cow HM-ESL   | N | II/F |       |      |     |      |      |       |      |  |     |      |
| Cow PM-ESL   | N | II/C |       |      |     |      |      |       |      |  |     |      |
| Cow PM       | O | II/C |       | IV/A |     | VI/F | II/F |       |      |  |     | VI/F |
| Goat HM-ESL  | P |      |       |      |     |      |      | III/F | IV/A |  |     |      |
| Sheep PM     | Q |      |       |      |     |      |      | III/F | IV/A |  |     |      |
| Goat PM      | Q |      | III/F |      |     | VI/A |      | III/F | IV/A |  |     |      |
| Sheep PM     | Q |      |       |      |     | VI/A |      | III/F | IV/A |  |     |      |
| Sheep PM     | Q |      |       |      |     | VI/C |      | III/F | IV/A |  |     |      |
| Sheep PM     | Q |      | III/F |      |     |      |      | III/F |      |  |     |      |
| Sheep HM-ESL | R | II/C |       |      |     |      | II/C |       |      |  |     |      |
| Sheep HM-ESL | R |      |       |      |     |      |      | III/F | IV/A |  |     |      |
| Goat HM-ESL  | R |      |       |      |     |      |      | III/F | IV/A |  |     |      |
| Goat HM-ESL  | R |      |       |      |     | VI/A | II/F |       | IV/A |  |     |      |
| Sheep HM-ESL | R |      |       |      |     | VI/A |      | III/F | IV/A |  |     |      |
| Goat HM-ESL  | R | II/F |       | IV/A |     |      | II/F | III/F | IV/A |  |     |      |
| Sheep HM-ESL | R | II/F |       |      |     |      | II/F | III/F | IV/A |  |     |      |
| Sheep HM-ESL | R | II/F |       |      |     |      |      |       | IV/A |  |     |      |
| Goat HM-ESL  | R | II/C |       |      |     |      |      |       |      |  |     |      |
| Goat HM-ESL  | R |      |       |      |     |      | II/C |       |      |  |     |      |
| Goat HM-ESL  | R |      |       |      |     |      | II/C | III/F |      |  |     |      |

Abbreviations: A – toxin profile A (*nhe+*, *hbl+*, *cytK+*); AF – after freezing, BF – before freezing; C – toxin profile C (*nhe+*, *hbl+*); D – toxin profile D (*nhe+*, *cytK+*); ESL – extended shelf life; F – toxin profile F (*nhe+*); HM – high-pasteurized milk; PM – pasteurized milk; RM – raw milk; II – *panC* group II (cytotoxic, growth  $\geq 7^{\circ}\text{C}$ ); III – *panC* group III (cytotoxic-highly cytotoxic, growth  $\geq 15^{\circ}\text{C}$ ); IV – *panC* group IV (cytotoxic-highly cytotoxic, growth  $\geq 10^{\circ}\text{C}$ ); V – *panC* group V (low cytotoxic, growth  $\geq 8^{\circ}\text{C}$ ); VI – *panC* group VI (non or low cytotoxic, growth  $\geq 5^{\circ}\text{C}$ ); Italic – detected before and after freezing. The different color coding indicates different *panC*/toxin profile combination types.
